# Supplementary material
Source: publisher figshare collection journal article supplement (https://sage.figshare.com/ndownloader/files/22090086)
Supplement: Supplementary file 1 [file 22090086]

| **Table 3. Clinical Data for NSG Mice Engrafted with Human Pediatric Solid Tumors** | | | | | | | | |
| --- | --- | --- | --- | --- | --- | --- | --- | --- |
| **Case** | **Gender** | **Age (weeks)** | **Microbiology testing** | **Leukocyte count** | **PDX** | **Days on study** | **EBER ISH** | **Xenograft** |
| 1 | Female | 15 | Blood culturea,b | 4.18 X 103/µL | Hepatoblastoma | 47 | - | +c |
| 2 | Female | 14 | n/d | n/d | Osteosarcoma | 54 | - | - |
| 3 | Female | 14 | Blood cultured | 7.72 X 103/µL | Rhabdomyosarcoma | 34 | - | - |
| 4 | Female | 32 | Blood cultured; Lung culturea | 86.74 X 103/µL | Hepatoblastoma | 61 | - | - |
| 5 | Female | 16 | Blood culturee,f | 2.98 X 103/µL | Malignant Thymoma | 46 | + | +c |
| 6 | Female | 17 | Blood culturef,g; Lung cultureg | 0.82 X 103/µL | Rhabdomyosarcomah | 60 | + | - |
| 7 | Female | 17 | Lung cultured; Synovial cultureb,f | 8.3 X 103/µL | Rhabdomyosarcomah | 60 | + | + |
| 8 | Female | 28 | Blood cultureb,i | 4.06 X 103/µL | Hepatoblastoma | 124 | + | + |
| 9 | Female | 21 | Blood cultured | 3.92 X 103/µL | Osteosarcomah | 64 | - | - |
| 10 | Female | 52 | Blood culturea | 1.24 X 103/µL | Osteosarcoma | 283 | - | - |
| 11 | Female | 26 | Blood cultured | 4.08 X 103/µL | Osteosarcomah | 99 | - | - |
| a: *Klebsiella pneumoniae*, b: *Staphylococcus lentus*, c: resolving tumor, d: no growth, e: *Rothia mucilaginosa*, f: *Streptococcus parasanguinis*, g: *Actinomyces meyeri*, h: Portions of the same patient tumor type (as listed) were implanted into separate mice,  i: *Staphylococcus xylosus*  PDX: patient derived xenograft, EBER: EBV-encoded small RNAs, ISH: *in situ* hybridization | | | | | | | | |
|  | | | |  |  |  |  |  |
|  | | | | | |  |  |  |
|  | | | |  |  |  |  |  |
